# Supplementary material
Source: PubMed Central journal article supplement (PMC11449491)
Supplement: NIHMS2018618-supplement-Supplementary_Material.pdf [file NIHMS2018618-supplement-Supplementary_Material.pdf]

## Supplementary Material

### Serum Metabolomic Profiling Identifies Potential Biomarkers in Arthritis in Older Adults: An exploratory study

Martha Cedeno<sup>1.&</sup>, Jessica Murillo-Saich PhD<sup>1.&</sup>, Roxana Coras MD, PhD<sup>1,2</sup>, Francesca Cedola MD<sup>1</sup>, Anahy Brandy MD<sup>3</sup>, Agueda Prior MD<sup>3</sup>, Anders Pedersen PhD<sup>4</sup>, Lourdes Mateo MD, PhD<sup>3</sup>, Melania Martinez-Morillo MD, PhD<sup>3,\*</sup>, Monica Guma MD, PhD<sup>1,2,5,\*</sup>

<sup>1</sup>Department of Medicine, University of California-San Diego, La Jolla, CA 92093,

<sup>2</sup>Department of Medicine, Autonomous University of Barcelona, Plaça Cívica, 08193 Bellaterra, Barcelona, Spain,

<sup>3</sup>Department of Rheumatology, Germans Trias i Pujol. University Hospital, Badalona, Carretera de Canyet. 08916 San Diego,

<sup>4</sup>Swedish NMR Centre, University of Gothenburg, 41390 Gothenburg, Sweden,

<sup>5</sup>VA Healthcare Service, San Diego, CA, 92161.

& These authors have contributed equally

\*Corresponding author:

Monica Guma; email: [mguma@health.ucsd.edu](mailto:mguma@health.ucsd.edu)

Melania Martinez-Morillo email: [melaniamm@gmail.com](mailto:melaniamm@gmail.com)

**Table S1. Tukey HSD post-hoc analysis displaying P values between EORA vs Control, PMR vs Control and PMR vs EORA**

| <b>Metabolite</b>      | <b>P value<br/>EORA vs Control</b> | <b>P value<br/>PMR vs Control</b> | <b>P value<br/>PMR vs EORA</b> |
|------------------------|------------------------------------|-----------------------------------|--------------------------------|
| 3-Hydroxybutyrate      | <b>0.004</b>                       | 0.29                              | 0.18                           |
| 3-Hydroxyisobutyrate   | 0.96                               | 0.41                              | 0.50                           |
| 3-Phenyllactate        | 0.97                               | 0.33                              | 0.38                           |
| Acetate                | <b>0.001</b>                       | 0.69                              | <b>0.01</b>                    |
| Acetoacetate           | 0.39                               | 0.78                              | 0.80                           |
| Acetone                | 0.96                               | 0.33                              | 0.39                           |
| Adenine                | 0.40                               | 0.98                              | 0.50                           |
| Alanine                | 0.93                               | 0.51                              | 0.25                           |
| Arginine               | 0.38                               | 0.98                              | 0.49                           |
| Asparagine             | 0.78                               | 0.64                              | 0.95                           |
| Betaine                | 0.82                               | 0.69                              | 0.96                           |
| Butyrate               | 0.17                               | 0.67                              | 0.61                           |
| Choline                | 0.12                               | 0.14                              | 1.00                           |
| Citrate                | 0.91                               | 1.00                              | 0.92                           |
| Creatine               | 0.94                               | 0.79                              | 0.93                           |
| Creatine Phosphate     | 0.87                               | 0.13                              | 0.24                           |
| Creatinine             | 0.92                               | 0.96                              | 0.99                           |
| Dimethylamine          | 0.36                               | 0.33                              | 0.99                           |
| Formate                | 0.92                               | 0.77                              | 0.47                           |
| Fumarate               | 0.96                               | 0.95                              | 0.81                           |
| Glucose                | <b>0.005</b>                       | 0.38                              | 0.16                           |
| Glutamate              | 0.25                               | 0.52                              | 0.90                           |
| Glutamine              | 0.93                               | 0.32                              | 0.13                           |
| Glycine                | 0.09                               | <b>0.006</b>                      | 0.39                           |
| Glycolate              | 0.97                               | 1.00                              | 0.97                           |
| Hydroxyacetone         | 0.99                               | 0.57                              | 0.57                           |
| Isobutyrate            | 0.98                               | 0.93                              | 0.98                           |
| Isoleucine             | 0.27                               | 0.96                              | 0.40                           |
| Isovalerate            | 0.87                               | 0.79                              | 0.98                           |
| Lactate                | <b>0.006</b>                       | 0.98                              | <b>0.008</b>                   |
| Leucine                | 0.47                               | 0.60                              | 0.99                           |
| Lysine                 | 0.74                               | 0.94                              | 0.91                           |
| Malate                 | 0.28                               | 0.93                              | 0.13                           |
| Methionine             | 0.77                               | 0.98                              | 0.62                           |
| Methylamine            | 0.95                               | 0.54                              | 0.30                           |
| Methylsuccinate        | 0.36                               | 0.35                              | 0.99                           |
| N,N-Dimethylglycine    | 0.89                               | 0.87                              | 1.00                           |
| N-Acetylaspartate      | 0.59                               | 0.59                              | 1.00                           |
| N-Phenylacetyl glycine | 0.92                               | 0.80                              | 0.95                           |
| O-Acetylcholine        | 1.00                               | 0.07                              | <b>0.04</b>                    |
| O-Phosphocholine       | 0.29                               | 0.85                              | 0.61                           |
| Ornithine              | 0.69                               | 0.58                              | 0.97                           |
| Pantothenate           | <b>0.04</b>                        | 0.35                              | 0.55                           |
| Phenylalanine          | 0.34                               | <b>0.05</b>                       | 0.47                           |
| Proline                | 0.48                               | 0.39                              | 0.96                           |
| Pyruvate               | 0.75                               | 0.12                              | 0.32                           |
| Sarcosine              | 0.59                               | 0.77                              | 0.97                           |
| Serine                 | 0.55                               | 0.25                              | 0.77                           |
| SG3PC                  | 0.87                               | 0.09                              | 0.17                           |
| Succinate              | 0.32                               | 1.00                              | 0.27                           |
| Taurine                | 0.86                               | 0.24                              | 0.06                           |

|                   |      |      |      |
|-------------------|------|------|------|
| Threonine         | 0.13 | 0.06 | 0.85 |
| Trimethylamine    | 0.64 | 0.94 | 0.84 |
| TMAO              | 0.80 | 0.55 | 0.88 |
| Tryptophan        | 0.91 | 0.93 | 0.69 |
| Tyrosine          | 0.61 | 0.33 | 0.82 |
| Valine            | 0.35 | 0.48 | 0.98 |
| t-Methylhistidine | 0.70 | 0.74 | 1.00 |

Tukey's post-hoc analysis after ANOVA adjusted by sex and DM. SG3PC: sn-glycero-3-phosphocholine; TMAO: Trimethylamine N- oxide.

**Table S2: Comparison of polar metabolites' concentration between EORA<sup>neg</sup> and PMR patients.**

| Metabolite             | PMR<br>N=20    | EORA <sup>neg</sup><br>N=28 | P           |
|------------------------|----------------|-----------------------------|-------------|
| 3-Hydroxybutyrate      | 24.27±21.86    | 36.40±28.26                 | 0.12        |
| 3-Hydroxyisobutyrate   | 10.37±3.04     | 9.41±3.03                   | 0.29        |
| 3-Phenyllactate        | 14.73±5.10     | 12.62±4.38                  | 0.13        |
| Acetate                | 25.53±6.35     | 31.48±8.67                  | <b>0.01</b> |
| Acetoacetate           | 4.78±6.08      | 6.28±12.89                  | 0.63        |
| Acetone                | 3.03±5.60      | 1.63±2.44                   | 0.24        |
| Adenine                | 12.43±3.99     | 11.60±3.22                  | 0.43        |
| Alanine                | 118.65±32.44   | 134.09±36.30                | 0.14        |
| Arginine               | 43.36±15.48    | 49.13±23.20                 | 0.34        |
| Asparagine             | 16.25±7.31     | 16.20±5.10                  | 0.98        |
| Betaine                | 10.90±7.70     | 10.68±6.08                  | 0.91        |
| Butyrate               | 8.79±2.78      | 8.26±2.23                   | 0.47        |
| Choline                | 10.71±2.58     | 10.93±2.15                  | 0.75        |
| Citrate                | 8.99±2.58      | 9.30±2.23                   | 0.65        |
| Creatine               | 11.35±3.85     | 11.81±4.48                  | 0.71        |
| Creatine Phosphate     | 11.77±6.75     | 9.85±3.34                   | 0.25        |
| Creatinine             | 6.27±3.83      | 6.23±2.74                   | 0.97        |
| Dimethylamine          | 1.70±.80       | 1.72±0.95                   | 0.92        |
| Formate                | 14.35±6.14     | 12.85±3.81                  | 0.30        |
| Fumarate               | 2.84±1.70      | 2.62±1.10                   | 0.59        |
| Glucose                | 1321.01±357.16 | 1561.20±643.18              | 0.14        |
| Glutamate              | 123.99±35.21   | 127.46±38.66                | 0.75        |
| Glutamine              | 27.05±9.22     | 22.35±8.02                  | 0.07        |
| Glycine                | 54.29±22.56    | 61.40±14.69                 | 0.19        |
| Glycolate              | 7.63±4.70      | 7.81±4.14                   | 0.89        |
| Hydroxyacetone         | 3.28±2.23      | 3.73±1.76                   | 0.44        |
| Isobutyrate            | 4.83±4.37      | 4.75±2.93                   | 0.94        |
| Isoleucine             | 28.44±5.65     | 31.14±8.28                  | 0.21        |
| Isovalerate            | 9.65±2.97      | 10.02±3.87                  | 0.72        |
| Lactate                | 710.61±153.32  | 894.90±256.11               | <b>0.01</b> |
| Leucine                | 44.07±10.89    | 45.15±18.82                 | 0.82        |
| Lysine                 | 39.89±10.09    | 41.64±16.29                 | 0.67        |
| Malate                 | 20.71±8.85     | 16.67±6.06                  | 0.07        |
| Methionine             | 1.95±1.14      | 2.24±1.18                   | 0.40        |
| Methylamine            | 4.00±5.65      | 2.55±0.91                   | 0.27        |
| Methylsuccinate        | 4.89±2.09      | 4.88±2.42                   | 0.99        |
| N,N-Dimethylglycine    | 1.27±.81       | 1.25±0.51                   | 0.95        |
| N-Acetylaspartate      | 4.11±3.37      | 4.02±1.79                   | 0.90        |
| N-Phenylacetyl glycine | 9.13±6.03      | 8.44±5.79                   | 0.69        |
| O-Acetylcholine        | 2.36±1.59      | 4.18±2.70                   | <b>0.01</b> |
| O-Phosphocholine       | 19.16±6.29     | 20.81±5.95                  | 0.36        |
| Ornithine              | 27.60±9.15     | 27.10±7.03                  | 0.83        |
| Pantothenate           | 6.07±3.05      | 7.06±4.07                   | 0.37        |
| Phenylalanine          | 15.68±4.49     | 14.27±4.10                  | 0.27        |
| Proline                | 58.42±38.03    | 56.74±18.34                 | 0.84        |
| Pyruvate               | 4.80±2.07      | 6.04±3.33                   | 0.15        |
| Sarcosine              | 5.65±1.67      | 5.33±2.51                   | 0.60        |
| Serine                 | 49.85±13.48    | 46.41±14.70                 | 0.41        |
| SG3PC                  | 135.18±43.97   | 113.23±44.72                | 0.10        |
| Succinate              | 4.09±1.01      | 3.68±0.71                   | 0.11        |
| Taurine                | 33.44±21.42    | 54.95±33.14                 | <b>0.01</b> |

|                   |             |             |      |
|-------------------|-------------|-------------|------|
| Threonine         | 27.73±8.48  | 29.61±7.45  | 0.42 |
| Trimethylamine    | 0.69±.46    | 0.64±0.31   | 0.69 |
| TMAO              | 4.91±6.55   | 4.08±4.93   | 0.62 |
| Tryptophan        | 16.25±6.83  | 17.65±5.38  | 0.43 |
| Tyrosine          | 24.10±5.39  | 23.21±4.90  | 0.56 |
| Valine            | 91.27±17.29 | 92.96±21.40 | 0.77 |
| t-Methylhistidine | 9.92±3.30   | 9.89±5.74   | 0.99 |

Variables expressed in mean  $\pm$  standard deviation. Student *t*-test was used to compare concentration of metabolites between groups. SG3PC: sn-glycero-3-phosphocholine; TMAO: Trimethylamine N- oxide.

**Table S3: Comparison of demographic and clinical characteristics between responders and non-responder in EORA<sup>neg</sup> patients.**

| Variable             | Responder<br>N=21 | Non-Responder<br>N=7 | p              |
|----------------------|-------------------|----------------------|----------------|
| Female, n (%)        | 5(24)             | 7(100)               | < <b>0.001</b> |
| Age, years           | 76.00±6.86        | 79.00±7.44           | 0.34           |
| BMI                  | 27.92±3.08        | 31.52±7.66           | 0.27           |
| DM, n (%)            | 9(43)             | 6(86)                | 0.08           |
| HBP, n (%)           | 15(71)            | 5(71)                | 1.00           |
| DL, n (%)            | 13(62)            | 6(86)                | 0.37           |
| Weight loss, n (%)   | 7(33)             | 3(43)                | 0.67           |
| Anorexia, n (%)      | 9(43)             | 5(71)                | 0.39           |
| Shoulder Pain, n (%) | 15(71)            | 6(86)                | 0.64           |
| Pelvis Pain, n (%)   | 10(48)            | 3(43)                | 1.00           |
| Stiffness, n (%)     | 20(95)            | 7(100)               | 1.00           |
| Fatigue, n (%)       | 14(67)            | 6(86)                | 0.63           |
| Tender joints        | 7.76±4.55         | 13.14±7.65           | 0.12           |
| Swollen joints       | 11.67±5.64        | 10.86±7.01           | 0.76           |
| Pain                 | 69.29±17.91       | 84.29±12.72          | <b>0.05</b>    |
| DAS-ESR              | 6.04±0.96         | 7.11±0.89            | <b>0.02</b>    |
| DAS-CRP              | 5.46±1.00         | 6.17±0.79            | 0.10           |
| CRP mg/dL            | 41.60±56.86       | 41.48±38.15          | 1.00           |
| ESR mm/h             | 46.57±27.14       | 70.43±19.37          | <b>0.04</b>    |
| TNF (pg/mL)          | 14.22±7.00        | 12.50±5.77           | 0.62           |
| IL-6 (pg/mL)         | 17.80±23.27       | 26.32±45.10          | 0.52           |
| NSAIDs, mg           | 557.14±53.45      | 200.00±261.01        | <b>0.01</b>    |
| Glucocorticoids, mg  | 8.95±3.32         | 9.14±3.02            | 0.89           |
| Methotrexate, n (%)  | 6 (28.6)          | 2 (28.6)             | 1.00           |

Continuous variables expressed in mean ± standard deviation; Categorical variables expressed in percentage. A student *t*-test was used to determine the significance of continuous variables while Pearson's Chi-square test was used for categorical variables. Note. BMI: Body mass index; DM: Diabetes mellitus; HBP: High blood pressure; DL: Dyslipidemia; ESR: Erythrocyte sedimentation rate; CRP: C-reactive protein; TNF: Tumor necrosis factor; IL-6: Interleukin 6; NSAIDs: Non-steroidal anti-inflammatory drugs.

**Table S4: Comparison of clinical characteristics between non-diabetic and diabetic in EORA<sup>neg</sup> patients.**

| <b>Variable</b> | <b>Non-Diabetic<br/>N=13</b> | <b>Diabetic<br/>N=15</b> | <b>P</b> |
|-----------------|------------------------------|--------------------------|----------|
| Tender Joints   | 9.54±4.94                    | 8.73±6.65                | 0.72     |
| Swollen Joints  | 11.31±5.19                   | 11.60±6.61               | 0.90     |
| ESR             | 54.00±30.02                  | 51.27±25.51              | 0.80     |
| CRP             | 56.77±66.53                  | 28.40±32.38              | 0.18     |
| DAS28ESR        | 6.36±0.92                    | 6.07±1.08                | 0.46     |
| DAS28CRP        | 5.89±0.97                    | 5.42±0.98                | 0.21     |
| IL-6            | 24.77±41.78                  | 15.74±11.65              | 0.46     |
| TNF             | 13.70±7.81                   | 14.00±5.89               | 0.92     |

Variables expressed in mean ± standard deviation. Student *t*-test was used to compare quantitative clinical variables between groups.

**Table S5: Polar metabolites' concentrations in EORA<sup>neg</sup> responders and non-responder at baseline according DAS-ESR based EULAR response criteria.**

| Metabolite             | Responder<br>N=21 | Non-Responder<br>N=7 | P adj.           |
|------------------------|-------------------|----------------------|------------------|
| 3-Hydroxybutyrate      | 31.40±28.05       | 51.41±24.91          | <b>0.02</b>      |
| 3-Hydroxyisobutyrate   | 9.32±2.89         | 9.66±3.67            | 0.65             |
| 3-Phenyllactate        | 12.01±4.01        | 14.44±5.24           | 0.25             |
| Acetate                | 29.77±6.94        | 36.61±11.72          | 0.09             |
| Acetoacetate           | 6.95±14.91        | 4.24±0.67            | 0.62             |
| Acetone                | 1.83±2.80         | 1.01±0.36            | 0.47             |
| Adenine                | 10.92±2.57        | 13.63±4.26           | <b>0.02</b>      |
| Alanine                | 132.97±27.99      | 137.46±57.44         | 0.75             |
| Arginine               | 47.20±22.41       | 54.93±26.39          | 0.56             |
| Asparagine             | 15.83±5.42        | 17.28±4.13           | 0.72             |
| Betaine                | 11.16±5.39        | 9.21±8.12            | 0.57             |
| Butyrate               | 8.31±2.24         | 8.11±2.36            | 0.96             |
| Choline                | 10.91±2.28        | 10.99±1.86           | 0.73             |
| Citrate                | 8.90±1.90         | 10.51±2.82           | 0.09             |
| Creatine               | 11.56±4.06        | 12.59±5.88           | 0.61             |
| Creatine Phosphate     | 9.98±3.51         | 9.46±3.00            | 0.85             |
| Creatinine             | 6.34±3.02         | 5.90±1.79            | 0.78             |
| Dimethylamine          | 1.72±0.93         | 1.73±1.11            | 0.96             |
| Formate                | 12.88±3.35        | 12.77±5.28           | 0.95             |
| Fumarate               | 2.51±1.03         | 2.94±1.33            | 0.37             |
| Glucose                | 1371.61±297.06    | 2129.96±1031.61      | <b>&lt;0.001</b> |
| Glutamate              | 135.29±38.91      | 104.00±28.65         | <b>0.05</b>      |
| Glutamine              | 21.27±8.44        | 25.27±6.00           | 0.24             |
| Glycine                | 63.37±11.32       | 55.49±22.14          | 0.21             |
| Glycolate              | 7.27±3.67         | 9.43±5.30            | 0.28             |
| Hydroxyacetone         | 3.60±1.84         | 4.11±1.58            | 0.66             |
| Isobutyrate            | 4.79±2.97         | 4.63±3.04            | 0.98             |
| Isoleucine             | 30.95±7.57        | 31.71±10.82          | 0.78             |
| Isovalerate            | 10.06±3.56        | 9.90±5.02            | 0.96             |
| Lactate                | 870.05±206.86     | 969.44±379.32        | 0.43             |
| Leucine                | 44.28±17.42       | 47.77±23.92          | 0.65             |
| Lysine                 | 43.80±16.11       | 35.19±16.24          | 0.24             |
| Malate                 | 15.85±6.26        | 19.13±4.98           | 0.25             |
| Methionine             | 2.13±1.28         | 2.56±0.82            | 0.50             |
| Methylamine            | 2.47±0.89         | 2.80±1.01            | 0.45             |
| Methylsuccinate        | 4.55±1.90         | 5.87±3.58            | 0.27             |
| N,N-Dimethylglycine    | 1.17±0.40         | 1.51±0.74            | 0.12             |
| N-Acetylaspartate      | 3.93±1.51         | 4.29±2.57            | 0.82             |
| N-Phenylacetyl glycine | 7.91±6.38         | 10.00±3.37           | 0.54             |
| O-Acetylcholine        | 4.31±3.08         | 3.77±0.95            | 0.56             |
| O-Phosphocholine       | 20.77±6.46        | 20.91±4.52           | 0.96             |
| Ornithine              | 28.02±7.11        | 24.33±6.48           | 0.29             |
| Pantothenate           | 6.45±3.71         | 8.87±4.84            | 0.21             |
| Phenylalanine          | 14.35±4.19        | 14.03±4.11           | 0.87             |
| Proline                | 58.04±18.15       | 52.84±19.79          | 0.58             |
| Pyruvate               | 5.87±3.44         | 6.57±3.14            | 0.70             |
| Sarcosine              | 5.35±2.40         | 5.27±3.04            | 0.88             |
| Serine                 | 44.46±15.70       | 52.26±9.86           | 0.29             |
| SG3PC                  | 107.10±39.80      | 131.60±56.53         | 0.21             |
| Succinate              | 3.61±0.64         | 3.89±0.92            | 0.29             |
| Taurine                | 26.77±7.10        | 80.70±47.64          | <b>0.02</b>      |



|                   |             |             |             |
|-------------------|-------------|-------------|-------------|
| Threonine         | 30.55±7.49  | 26.77±7.10  | 0.33        |
| Trimethylamine    | 0.64±0.33   | 0.64±0.28   | 0.87        |
| TMAO              | 2.98±3.54   | 7.40±7.10   | <b>0.04</b> |
| Tryptophan        | 17.48±3.73  | 18.17±9.13  | 0.77        |
| Tyrosine          | 22.53±4.75  | 25.23±5.12  | 0.23        |
| Valine            | 91.71±22.95 | 91.71±22.95 | 0.95        |
| t-Methylhistidine | 9.46±4.29   | 11.19±9.17  | 0.55        |

A student *t*-test was used to determine the significance of metabolic concentrations between groups. Variables expressed in mean ± standard deviation. Concentration expressed in µM. The DAS-ESR was considered to calculate the response criteria, according to EULAR. Note. TMAO: Trimethylamine N-Oxide, SG3PC: Sn-Glycero-3-Phosphocholine. P adj:P adjusted by DM and sex.

**Table S6: Polar metabolites' concentrations in control, EORA<sup>neg</sup> responders and non-responders at baseline according DAS-ESR based EULAR response criteria.**

| Metabolite             | Control<br>N=18  | Responder<br>N=21 | Non-Responder<br>N=7 | P adj. |
|------------------------|------------------|-------------------|----------------------|--------|
| 3-Hydroxybutyrate      | 15.61±7.60**     | 31.40±28.05       | 51.41±24.91***       | <0.001 |
| 3-Hydroxyisobutyrate   | 8.92±4.53        | 9.32±2.89         | 9.66±3.67            | 0.90   |
| 3-Phenyllactate        | 12.38±5.47       | 12.01±4.01        | 14.44±5.24           | 0.54   |
| Acetate                | 23.63±5.52**     | 29.77±6.94*       | 36.61±11.72          | <0.001 |
| Acetoacetate           | 2.79±1.80        | 6.95±14.91        | 4.24±0.67            | 0.41   |
| Acetone                | 1.37±1.09        | 1.83±2.80         | 1.01±0.36            | 0.59   |
| Adenine                | 12.63±2.72       | 10.92±2.57        | 13.63±4.26***        | 0.02   |
| Alanine                | 130.05±31.56     | 132.97±27.99      | 137.46±57.44         | 0.88   |
| Arginine               | 41.98±20.04      | 47.20±22.41       | 54.93±26.39          | 0.39   |
| Asparagine             | 18.03±6.80       | 15.83±5.42        | 17.28±4.13           | 0.73   |
| Betaine                | 9.11±6.04        | 11.16±5.39        | 9.21±8.12            | 0.69   |
| Butyrate               | 9.49±2.68        | 8.31±2.24         | 8.11±2.36            | 0.16   |
| Choline                | 12.19±2.91       | 10.91±2.28        | 10.99±1.86           | 0.14   |
| Citrate                | 8.96±2.22        | 8.90±1.90         | 10.51±2.82           | 0.20   |
| Creatine               | 12.21±3.84       | 11.56±4.06        | 12.59±5.88           | 0.81   |
| Creatine Phosphate     | 9.00±2.68        | 9.98±3.51         | 9.46±3.00            | 0.76   |
| Creatinine             | 6.54±3.84        | 6.34±3.02         | 5.90±1.79            | 0.89   |
| Dimethylamine          | 2.18±1.31        | 1.72±0.93         | 1.73±1.11            | 0.46   |
| Formate                | 13.26±4.06       | 12.88±3.35        | 12.77±5.28           | 0.89   |
| Fumarate               | 2.71±1.15        | 2.51±1.03         | 2.94±1.33            | 0.62   |
| Glucose                | 1142.19±273.30** | 1371.61±297.06    | 2129.96±1031.61***   | <0.001 |
| Glutamate              | 111.29±36.57     | 135.29±38.91      | 104.00±28.65         | 0.04   |
| Glutamine              | 23.14±6.62       | 21.27±8.44        | 25.27±6.00           | 0.39   |
| Glycine                | 74.28±22.06**    | 63.37±11.32       | 55.49±22.14          | 0.03   |
| Glycolate              | 7.61±3.47        | 7.27±3.67         | 9.43±5.30            | 0.50   |
| Hydroxyacetone         | 3.92±1.86        | 3.60±1.84         | 4.11±1.58            | 0.90   |
| Isobutyrate            | 4.46±2.25        | 4.79±2.97         | 4.63±3.04            | 0.97   |
| Isoleucine             | 27.86±7.07       | 30.95±7.57        | 31.71±10.82          | 0.38   |
| Isovalerate            | 10.31±2.60       | 10.06±3.56        | 9.90±5.02            | 0.88   |
| Lactate                | 697.53±199.29**  | 870.05±206.86     | 969.44±379.32        | 0.02   |
| Leucine                | 39.26±13.96      | 44.28±17.42       | 47.77±23.92          | 0.49   |
| Lysine                 | 38.53±10.28      | 43.80±16.11       | 35.19±16.24          | 0.31   |
| Malate                 | 19.93±5.61       | 15.85±6.26        | 19.13±4.98           | 0.12   |
| Methionine             | 2.03±1.13        | 2.13±1.28         | 2.56±0.82            | 0.62   |
| Methylamine            | 2.87±1.32        | 2.47±0.89         | 2.80±1.01            | 0.52   |
| Methylsuccinate        | 5.94±2.61        | 4.55±1.90         | 5.87±3.58            | 0.20   |
| N,N-Dimethylglycine    | 1.16±.67         | 1.17±0.40         | 1.51±0.74            | 0.31   |
| N-Acetylaspartate      | 4.86±1.56        | 3.93±1.51         | 4.29±2.57            | 0.37   |
| N-Phenylacetyl glycine | 8.06±3.69        | 7.91±6.38         | 10.00±3.37           | 0.72   |
| O-Acetylcholine        | 4.23±2.65        | 4.31±3.08         | 3.77±0.95            | 0.83   |
| O-Phosphocholine       | 18.06±6.00       | 20.77±6.46        | 20.91±4.52           | 0.32   |
| Ornithine              | 24.90±9.84       | 28.02±7.11        | 24.33±6.48           | 0.43   |
| Pantothenate           | 4.51±2.58**      | 6.45±3.71         | 8.87±4.84            | 0.03   |
| Phenylalanine          | 12.53±3.21       | 14.35±4.19        | 14.03±4.11           | 0.34   |
| Proline                | 46.99±19.09      | 58.04±18.15       | 52.84±19.79          | 0.23   |
| Pyruvate               | 6.84±3.69        | 5.87±3.44         | 6.57±3.14            | 0.76   |
| Sarcosine              | 6.34±3.33        | 5.35±2.40         | 5.27±3.04            | 0.68   |
| Serine                 | 42.07±15.79      | 44.46±15.70       | 52.26±9.86           | 0.33   |
| SG3PC                  | 106.86±39.32     | 107.10±39.80      | 131.60±56.53         | 0.37   |
| Succinate              | 4.07±1.15        | 3.61±0.64         | 3.89±0.92            | 0.25   |
| Taurine                | 49.31±33.76      | 26.77±7.10        | 80.70±47.64***       | 0.04   |

|                   |             |             |              |             |
|-------------------|-------------|-------------|--------------|-------------|
| Threonine         | 34.29±10.66 | 30.55±7.49  | 26.77±7.10   | 0.13        |
| Trimethylamine    | 0.73±.39    | 0.64±0.33   | 0.64±0.28    | 0.60        |
| TMAO              | 3.21±2.92   | 2.98±3.54   | 7.40±7.10*** | <b>0.05</b> |
| Tryptophan        | 16.92±4.78  | 17.48±3.73  | 18.17±9.13   | 0.86        |
| Tyrosine          | 21.64±5.19  | 22.53±4.75  | 25.23±5.12   | 0.29        |
| Valine            | 84.84±16.07 | 91.71±22.95 | 91.71±22.95  | 0.43        |
| t-Methylhistidine | 8.87±2.26   | 9.46±4.29   | 11.19±9.17   | 0.56        |

Variables expressed in mean ± standard deviation. ANOVA (Tukey HSD post hoc) was used to determine the significance of metabolites between groups. Concentration expressed in µM. DAS-ESR was considered to calculate the response criteria, according to EULAR. Note. TMAO: Trimethylamine N-Oxide, SG3PC: Sn-Glycero-3-Phosphocholine. P adj: P value of variables adjusted by DM and sex. \*P<0.05 control vs responder; \*\*P<0.05 control vs non-responder; \*\*\* P<0.05 responder & non-responder.

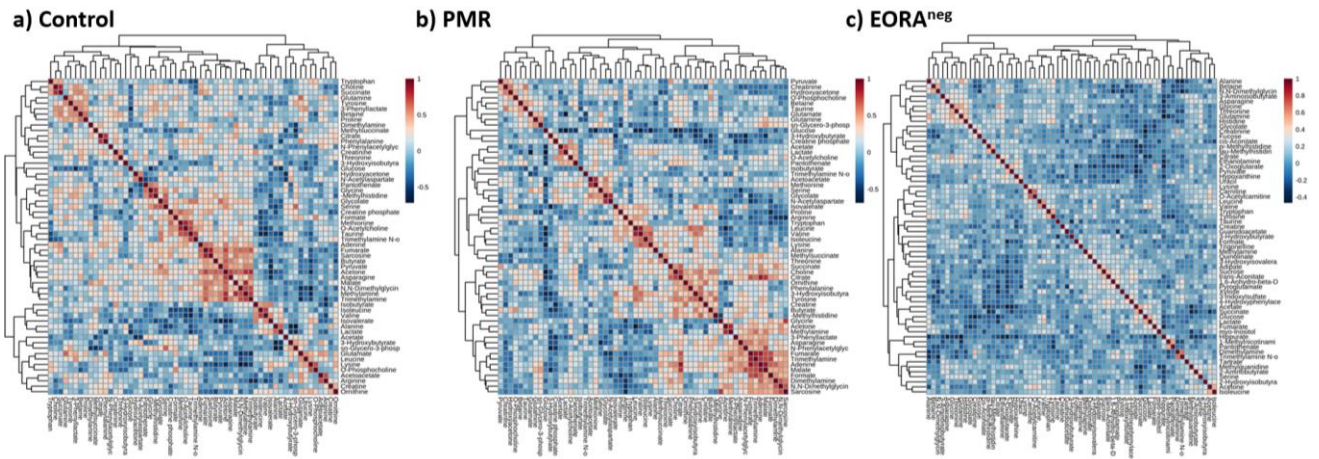

**Figure S1: Heatmap and hierarchical cluster analysis indicating associations between polar metabolites identified by <sup>1</sup>H-NMR in serum. a) Controls, b) PMR and c) EORA<sup>neg</sup> samples showing differences in patterns.**

a) Control

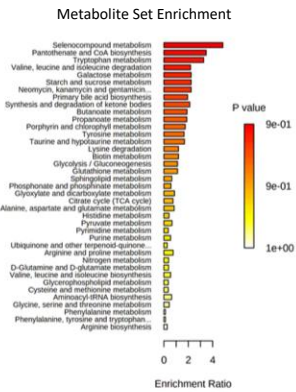

b) PMR

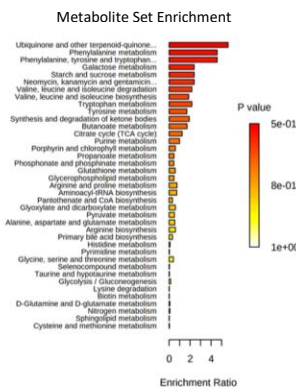

c) EORA<sup>neg</sup>

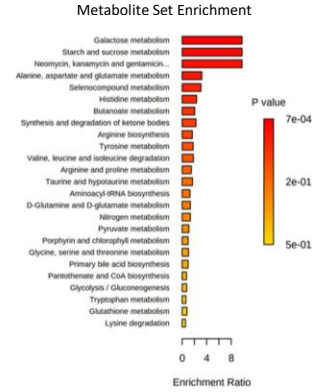

**Figure S2: Metabolomic pathway analysis obtained by MetaboAnalyst in the three groups.** a) Control b) PMR c) EORA<sup>neg</sup> samples. The metabolite sets enrichment overview considering the top 25 metabolic sets of enrichment in the 3 groups are very different. While for controls, selenocompound and tryptophan metabolism and pantothenate and CoA biosynthesis are the most enriched pathways, for EORA<sup>neg</sup>, the galactose metabolism is the predominant pathway. On the other hand, phenylalanine, tyrosine, tryptophan and ubiquinone metabolism were the most enriched sets for PMR.

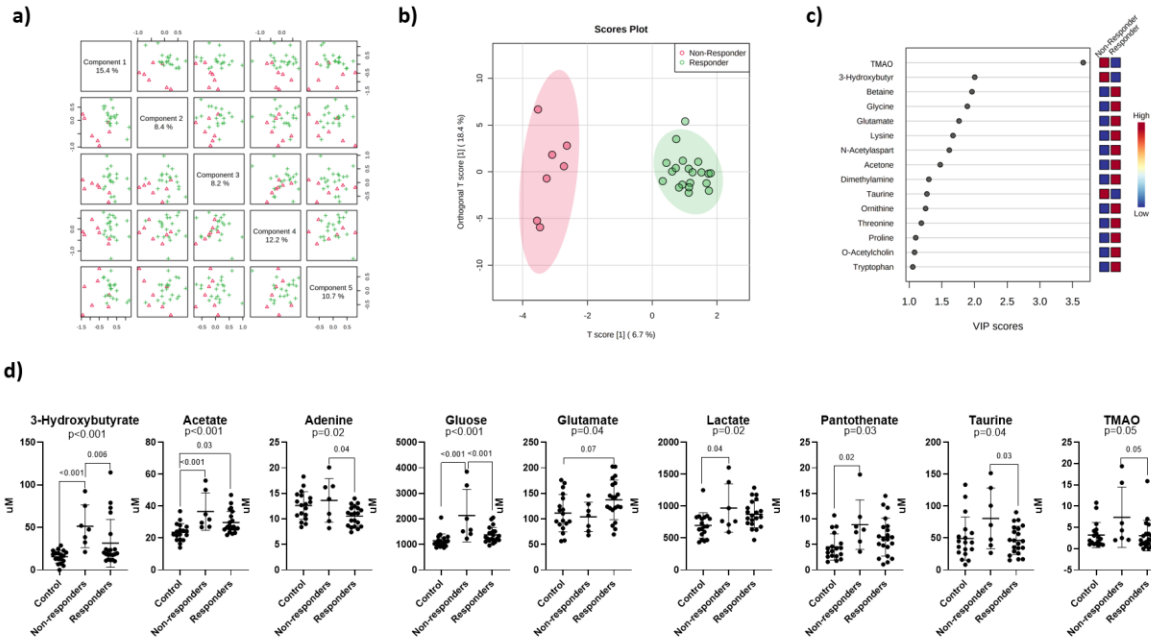

**Figure S3. Comparison of metabolomic profile between responders and non-responders according DAS-ESR based EULAR response criteria.** a) Component analysis with a total variance of 54.9% b) OPLS-DA showing a clear separation between responders and non-responders c) VIP Scores d) Metabolite concentration in controls, responders, and non-responders according DAS-ESR based EULAR response criteria. P-value below metabolite name shows the overall ANOVA significance while the p-value between groups is from the Tukey HSD post-hoc analysis. TMAO: Trimethylamine N-Oxide.
